# Supplementary material
Source: publisher site journal article supplement (https://www.spandidos-publications.com/7731/downloadSupplementary)
Supplement: Supplementary file 1 [file downloadSupplementary]

Table SI. Search strategies in online databases.

| Online databases                        | Search strategy                                                                                                                                                                                                                                                                                                     | No. of studies |
|-----------------------------------------|---------------------------------------------------------------------------------------------------------------------------------------------------------------------------------------------------------------------------------------------------------------------------------------------------------------------|----------------|
| PubMed                                  | [("maternally expressed gene 3") OR (MEG3) OR (rs7158663) OR (rs4081134) OR (rs11160608) OR (rs3087918) OR (rs3783355) OR (rs2281511) OR (rs12431658) OR (rs10132552)] AND (polymorphism OR variant OR mutation) AND (cancer)                                                                                       | 83             |
| Excerpta Medica Database                | ('maternally expressed gene 3' OR 'MEG3' OR 'rs7158663' OR 'rs4081134' OR 'rs11160608' OR 'rs3087918' OR 'rs3783355' OR 'rs2281511' OR 'rs12431658' OR 'rs10132552') AND ('polymorphism' OR 'variant' OR 'mutation') AND ('cancer')                                                                                 | 199            |
| Web of Science                          | (TS=((maternally expressed gene 3) OR (MEG3) OR (rs7158663) OR (rs4081134) OR (rs11160608) OR (rs3087918) OR (rs3783355) OR (rs2281511) OR (rs12431658) OR (rs10132552))) AND (TS=((polymorphism) OR (variant) OR (mutation))) AND (TS=(cancer))                                                                    | 124            |
| China National Knowledge Infrastructure | SU=('polymorphism'+ 'variant'+ 'mutation')*( 'maternally expressed gene 3'+ 'MEG3'+ 'rs7158663' + 'rs4081134' + 'rs11160608' + 'rs3087918' + 'rs3783355' + 'rs2281511'+ 'rs12431658' + 'rs10132552')*( 'tumor'+ 'cancer')                                                                                           | 9              |
| Wanfang                                 | [SU:( polymorphism) or SU:( variant) or SU:( mutation)] and [SU: (maternally expressed gene 3) or SU:(MEG3) or SU:( MEG3) or SU: (rs7158663) or SU: (rs4081134) or SU: (11160608) or SU: (rs3087918) or SU: (rs3783355) or SU: (rs2281511) or SU: (rs12431658) or SU: (rs10132552)] and [SU:(tumor) or 主题:(cancer)] | 43             |

Table SII. Newcastle-Ottawa Quality Assessment Scale for quality evaluation.

| Criteria                                                                                                                        | Score |
|---------------------------------------------------------------------------------------------------------------------------------|-------|
| Representativeness of cases                                                                                                     |       |
| Consecutive/randomly selected cases with clearly defined sampling frame with time, race, quantity and defined criteria          | 2     |
| Not consecutive/randomly selected case or without clearly defined sampling frame with time, race, quantity and defined criteria | 1     |
| Not described                                                                                                                   | 0     |
| Source of controls                                                                                                              |       |
| Population                                                                                                                      | 2     |
| Healthy                                                                                                                         | 1     |
| Hospital/NA                                                                                                                     | 0     |
| Hardy-Weinberg equilibrium in controls                                                                                          |       |
| Hardy-Weinberg equilibrium                                                                                                      | 2     |
| Hardy-Weinberg disequilibrium                                                                                                   | 1     |
| Not available                                                                                                                   | 0     |
| Genotyping examination                                                                                                          |       |
| Genotyping under 'blinded' condition and repeated                                                                               | 2     |
| Genotyping under 'blinded' condition or repeated                                                                                | 1     |
| Unblinded or not mentioned and unrepeated                                                                                       | 0     |
| Subjects, n                                                                                                                     |       |
| ≥500                                                                                                                            | 1     |
| <500                                                                                                                            | 0     |
| Association assessment                                                                                                          |       |
| Assess association between genotypes and cancer risk with appropriate statistics and adjustment for confounders                 | 2     |
| Assess association between genotypes and cancer risk with appropriate statistics and without adjustment for confounders         | 1     |
| Inappropriate statistics used                                                                                                   | 0     |

NA, not available.
